# Supplementary material for: Land Use and Land Cover Changes in Depopulated Areas of Mediterranean Europe: A Case Study in Two Inland Provinces of Spain
Source: MDPI journal article supplement (doi:10.3390/land12111967), 2023-10-25
Supplement: s1 [file s1]

## Supplementary material

**Table S1.** Land use/land cover transition matrix in hectares. 2000-2018. Soria.

|                                                | <i>Artificial<br/>surfaces</i> | <i>Agricultural<br/>areas</i> | <i>Land principally<br/>occupied by<br/>agriculture</i> | <i>Forest</i> | <i>Natural<br/>grasslands</i> | <i>Shrub</i> | <i>Open spaces with<br/>little vegetation</i> | <i>Burnt<br/>areas</i> | <i>Water<br/>bodies</i> | <i>Total<br/>2000</i> |
|------------------------------------------------|--------------------------------|-------------------------------|---------------------------------------------------------|---------------|-------------------------------|--------------|-----------------------------------------------|------------------------|-------------------------|-----------------------|
| <i>Artificial surfaces</i>                     | 978                            | 130                           | 2                                                       | 74            | 43                            | 72           | 0                                             | 0                      | 0                       | 1299                  |
| Agricultural areas                             | 2177                           | 328398                        | 7331                                                    | 15819         | 14459                         | 21908        | 214                                           | 0                      | 18                      | 390323                |
| Land principally<br>occupied by<br>agriculture | 322                            | 45337                         | 9738                                                    | 6947          | 10412                         | 15848        | 371                                           | 0                      | 0                       | 88973                 |
| Forest                                         | 238                            | 4162                          | 502                                                     | 217331        | 7428                          | 18821        | 97                                            | 0                      | 80                      | 248659                |
| Natural grasslands                             | 139                            | 8321                          | 956                                                     | 5189          | 30418                         | 13291        | 750                                           | 0                      | 247                     | 59309                 |
| Shrub                                          | 287                            | 15363                         | 1736                                                    | 74627         | 46980                         | 92638        | 1937                                          | 0                      | 141                     | 233706                |
| Open spaces with<br>little vegetation          | 0                              | 69                            | 8                                                       | 326           | 837                           | 816          | 991                                           | 0                      | 0                       | 3045                  |
| Burnt areas                                    | 0                              | 12                            | 0                                                       | 542           | 314                           | 1542         | 0                                             | 0                      | 0                       | 2409                  |
| Water bodies                                   | 1                              | 10                            | 0                                                       | 155           | 7                             | 68           | 0                                             | 0                      | 1950                    | 2190                  |
| Total 2018                                     | 4141                           | 401801                        | 20270                                                   | 321009        | 110896                        | 165003       | 4358                                          | 0                      | 2436                    | 1029914               |

**Table S2.** Land use/land cover transition matrix in hectares. 2000-2018. Teruel.

|                                                | <i>Artificial<br/>surfaces</i> | <i>Agricultural<br/>areas</i> | <i>Land principally<br/>occupied by<br/>agriculture</i> | <i>Forest</i> | <i>Natural<br/>grasslands</i> | <i>Shrub</i> | <i>Open spaces with<br/>little vegetation</i> | <i>Burnt<br/>areas</i> | <i>Water<br/>bodies</i> | <i>Total<br/>2000</i> |
|------------------------------------------------|--------------------------------|-------------------------------|---------------------------------------------------------|---------------|-------------------------------|--------------|-----------------------------------------------|------------------------|-------------------------|-----------------------|
| <i>Artificial surfaces</i>                     | 5321                           | 693                           | 101                                                     | 123           | 65                            | 255          | 24                                            | 0                      | 0                       | 6581                  |
| Agricultural areas                             | 3390                           | 416871                        | 38924                                                   | 17359         | 7176                          | 42439        | 998                                           | 0                      | 429                     | 527586                |
| Land principally<br>occupied by<br>agriculture | 690                            | 18986                         | 19158                                                   | 7573          | 2007                          | 22505        | 253                                           | 0                      | 60                      | 71233                 |
| Forest                                         | 140                            | 8037                          | 4241                                                    | 283090        | 2621                          | 30193        | 1196                                          | 0                      | 41                      | 329558                |
| Natural grasslands                             | 337                            | 3356                          | 2986                                                    | 2807          | 22635                         | 34967        | 44                                            | 0                      | 124                     | 67255                 |
| Shrub                                          | 772                            | 17938                         | 14782                                                   | 103745        | 24306                         | 302270       | 3098                                          | 0                      | 157                     | 467067                |
| Open spaces with<br>little vegetation          | 74                             | 590                           | 521                                                     | 579           | 130                           | 3538         | 4272                                          | 0                      | 3                       | 9704                  |
| Burnt areas                                    | 0                              | 0                             | 0                                                       | 9             | 0                             | 54           | 0                                             | 0                      | 0                       | 62                    |
| Water bodies                                   | 63                             | 79                            | 18                                                      | 43            | 6                             | 57           | 0                                             | 0                      | 1754                    | 2019                  |
| Total 2018                                     | 10787                          | 466549                        | 80729                                                   | 415326        | 58945                         | 436278       | 9885                                          | 0                      | 2567                    | 2956956               |
